# Supplementary material for: Brazilian Clinical Strains of Actinobacillus pleuropneumoniae and Pasteurella multocida: Capsular Diversity, Antimicrobial Susceptibility (In Vitro) and Proof of Concept for Prevention of Natural Colonization by Multi-Doses Protocol of Tildipirosin
Source: MDPI journal article supplement (doi:10.3390/antibiotics12121658), 2023-11-25
Supplement: s1 [file s1]

### Supplementary material

**Table S1.** Results of the *p* values obtained for the statistical analysis performed for the *A. pleuropneumoniae* tildipirosin susceptibility percentages and the variables “Central or Southern Brazilian regions”, “isolation year”, “origin from farm or slaughterhouses” and “*A. pleuropneumoniae* serovar”.

| Variables compared   | Rate of susceptibility (%) | two-tailed <i>p</i> value |
|----------------------|----------------------------|---------------------------|
| Tildipirosin versus: |                            |                           |
| Central states       | 97.1                       | 0.171                     |
| Southern states      | 90.3                       |                           |
| 2014–2015            | 100.0                      | 0.185                     |
| 2016–2017            | 90.7                       |                           |
| 2018                 | 96.2                       |                           |
| Farms                | 100.0                      | 0.068                     |
| Slaughterhouses      | 91.2                       |                           |
| Serovar 1            | 100.0                      | 0.075                     |
| Serovar 5            | 100.0                      |                           |
| Serovar 6            | 100.0                      |                           |
| Serovar 7            | 92.0                       |                           |
| Serovar 8            | 95.3                       |                           |
| Serovar 14           | 100.0                      |                           |
| Non-typable isolates | 100.0                      |                           |

**Table S2.** Results of the *p* values obtained for the statistical analysis performed for *P. multocida* tildipirosin susceptibility percentages and the variables “Central or Southern Brazilian regions”, “isolation place”, “pig age”, and “presence of absence of *P. multocida* *pfhA* gene”.

| Variables compared   | Rate of susceptibility (%) | two-tailed <i>p</i> value |
|----------------------|----------------------------|---------------------------|
| Tildipirosin versus: |                            |                           |
| Central states       | 75.0                       | 0.287                     |
| Southern states      | 50.0                       |                           |
| 2017                 | 70.0                       | 0.379                     |
| 2018                 | 72.7                       |                           |
| 2019                 | 70.4                       |                           |
| 2020                 | 100.0                      |                           |
| 2021                 | 50.0                       |                           |
| Farms                | 71.9                       | 1.000                     |
| Slaughterhouses      | 75.0                       |                           |
| ≤ 30 days            | 33.3                       | 0.223                     |
| 31–70 days           | 66.7                       |                           |
| > 70 days            | 77.1                       |                           |
| <i>pfhA</i> +        | 60.0                       | 0.433                     |
| <i>pfhA</i> -        | 76.0                       |                           |
